# Supplementary material
Source: PubMed Central journal article supplement (PMC4180126)
Supplement: Supp_Figure1.pdf [file Supp_Figure1.pdf]

## Supplementary Data

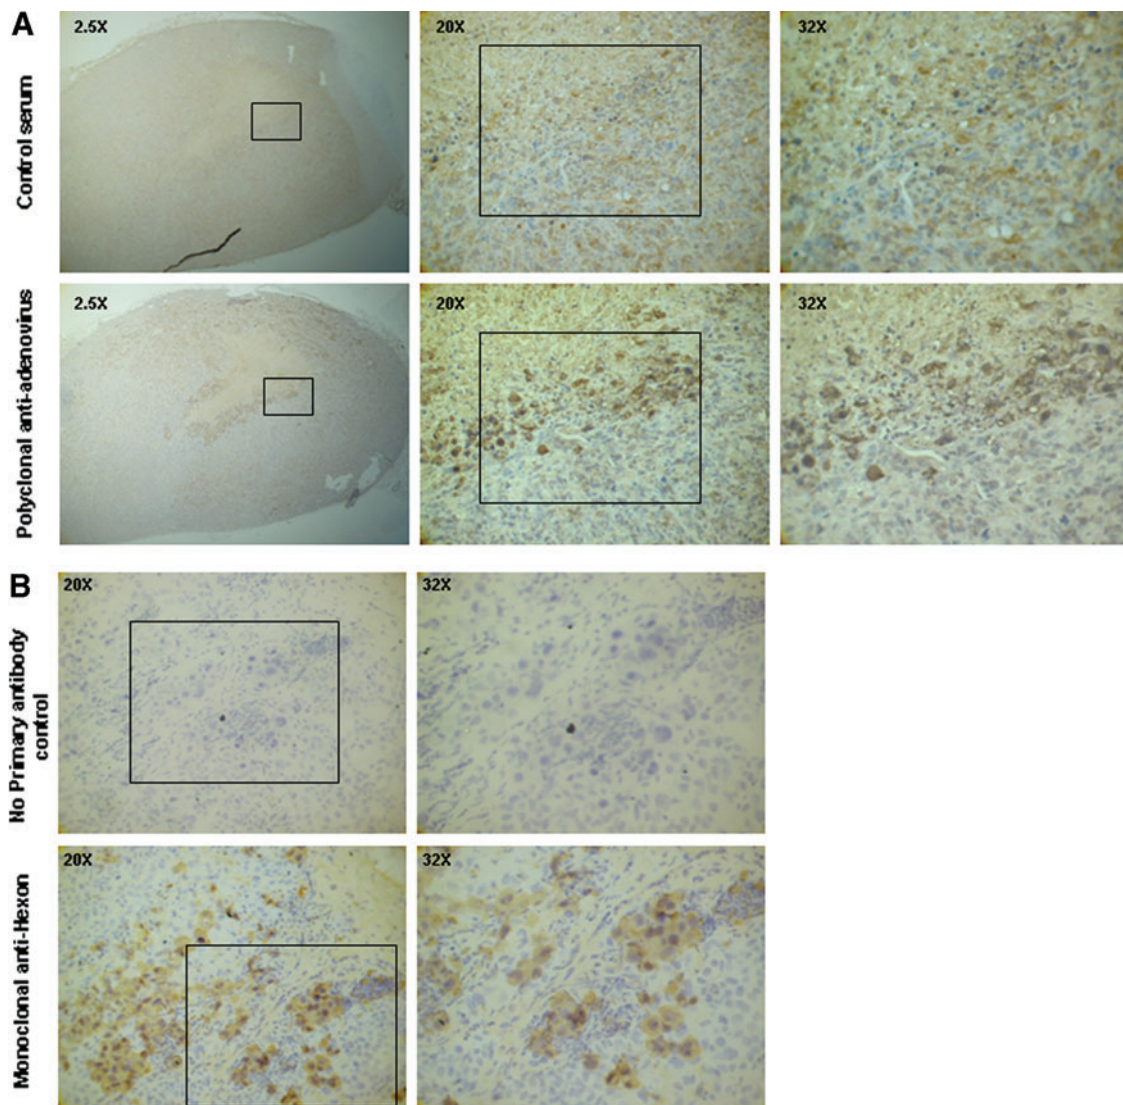

**SUPPLEMENTARY FIG. S1.** Immunohistochemical control staining for adenovirus in ORCA-010-injected xenograft tumors. **(A)** A tumor injected with  $4.3 \times 10^9$  VP ( $3.3 \times 10^8$  IU) ORCA-010 and collected at 7 days postinjection was stained for presence of adenovirus by IHC. IHC staining was done using polyclonal rabbit antihuman adenovirus antibody (Ab6982-100; Abcam) or with negative control rabbit serum, and sections were counterstained with hematoxylin. Pictures were taken at 2.5-, 20-, and 32-fold magnification, as indicated. The rectangle in the pictures indicates an approximation of the magnified area shown in the subsequent magnification. Cells positive for adenovirus are stained brown. **(B)** A tumor injected with  $4.3 \times 10^9$  VP ( $3.3 \times 10^8$  IU) ORCA-010 and collected at 3 days postinjection was stained for hexon. (Immuno)histochemical staining was done using monoclonal antihexon antibody (Ab8249; Abcam). As control, a section was stained omitting the primary antihexon antibody. All sections were counterstained with hematoxylin. Pictures were taken at 20- and 32-fold magnification, as indicated. The rectangle in the pictures indicates an approximation of the magnified area shown in the subsequent magnification. Cells positive for adenovirus are stained brown.
